# Supplementary material
Source: PubMed Central journal article supplement (PMC3382929)
Supplement: supp_blood-2012-01-405365_blood-2012-01-405365-1.pdf [file supp_blood-2012-01-405365_blood-2012-01-405365-1.pdf]

## SUPPLEMENTAL DATA

### a. CAR<sup>neg</sup> T cells

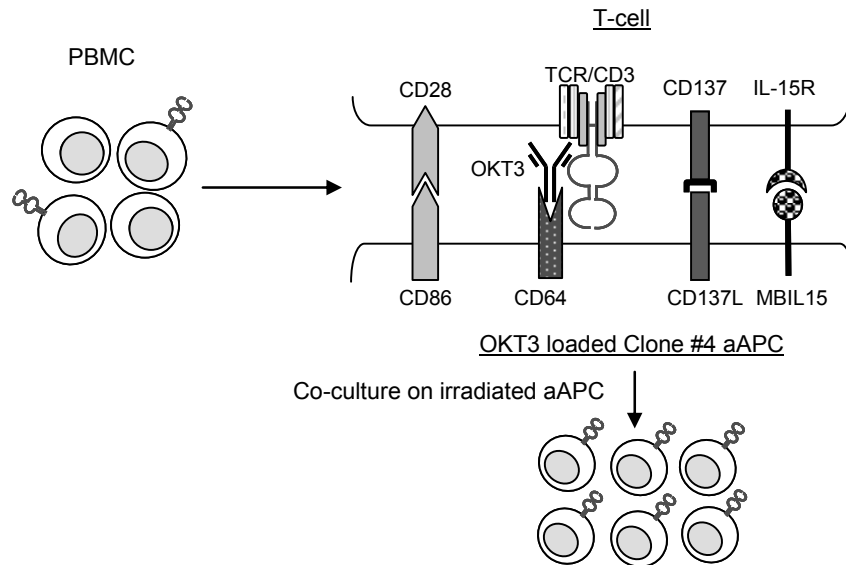

### b. CAR<sup>+</sup> T cells

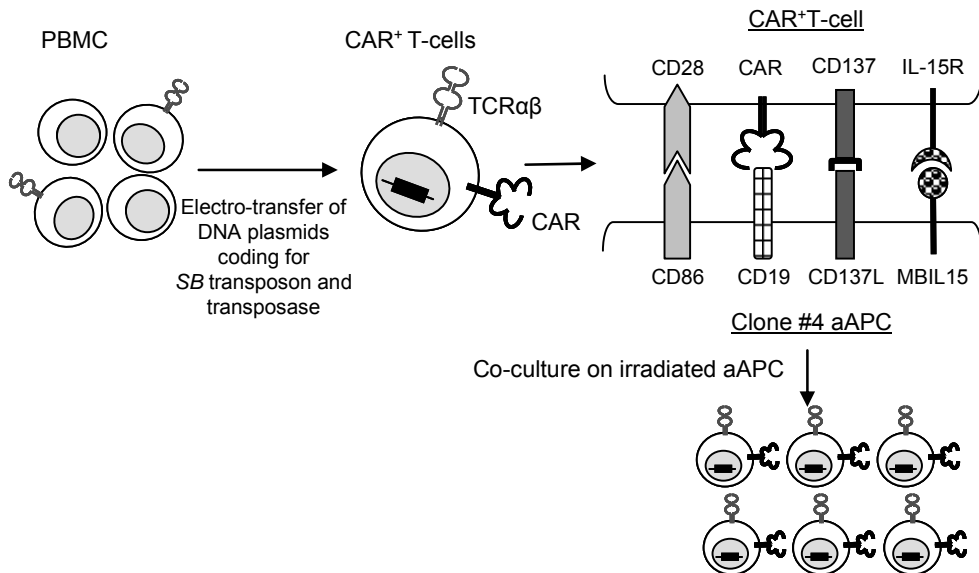

## Supplemental Figure 1

### **Schematic of the approach to genetically modify and propagate T-cells from PBMC.**

(a) T-cells were propagated by stimulation with OKT3 loaded  $\gamma$ -irradiated aAPC (clone #4) in the presence of soluble IL-2 (b) DNA plasmids coding for SB transposon (CD19RC28) and SB transposase (SB11) were electro-transferred into primary human T-cells. CAR<sup>+</sup> T cells were selectively propagated by repeated additions of  $\gamma$ -irradiated aAPC (clone #4) in the presence of rhIL-2.

a.

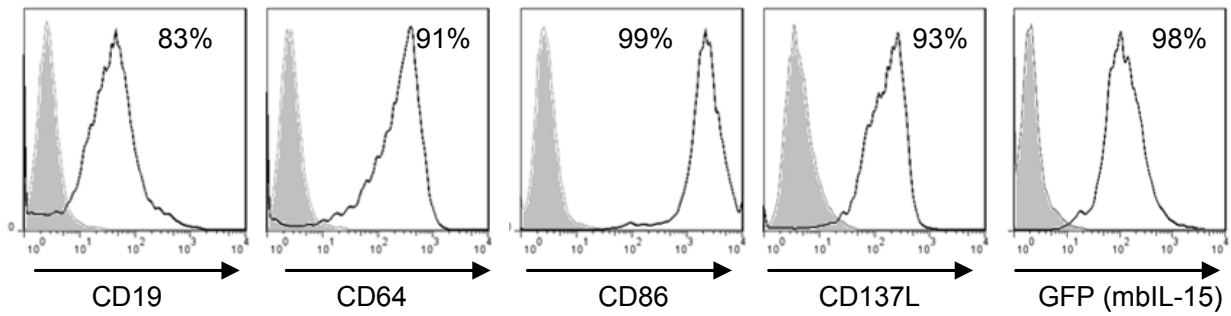

b.

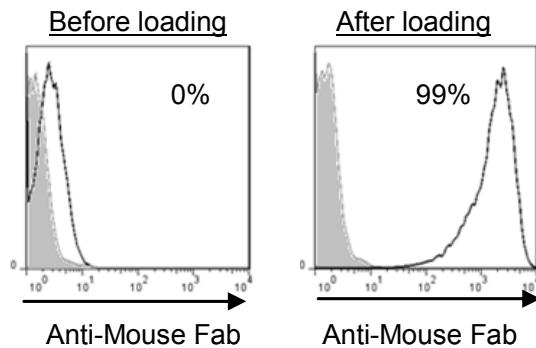

### Supplemental Figure 2

**Characterization of aAPC clone #4.** (a) Flow cytometry was used to compare expression of CD19, CD64, CD86, CD137L and MBIL-15 between parental K562 (grey shaded histogram) and K562-aAPC clone #4 (black open histogram). MBIL-15 is composed of human IL-15 peptide fused to modified human IgG4 Fc region and CD4 transmembrane domain and was detected by presence of EGFP (co-expressed with MBIL-15 after IRES element). aAPC were used to co-culture T-cells if expression of introduced transgenes were  $\geq 80\%$ . (b) OKT3 was loaded onto aAPC clone #4 at  $1 \mu\text{g}$  per  $10^6$  cells. Flow cytometry data before and after OKT3 loading detected by antibody specific for mouse Fab region. No-staining control: grey shaded histogram, stain with anti-mouse Fab: black open histogram.
